# Supplementary material for: A different view on fine-scale population structure in Western African populations
Source: PubMed Central journal article supplement (PMC6942040; doi:10.1007/s00439-019-02069-7), 2019-10-19

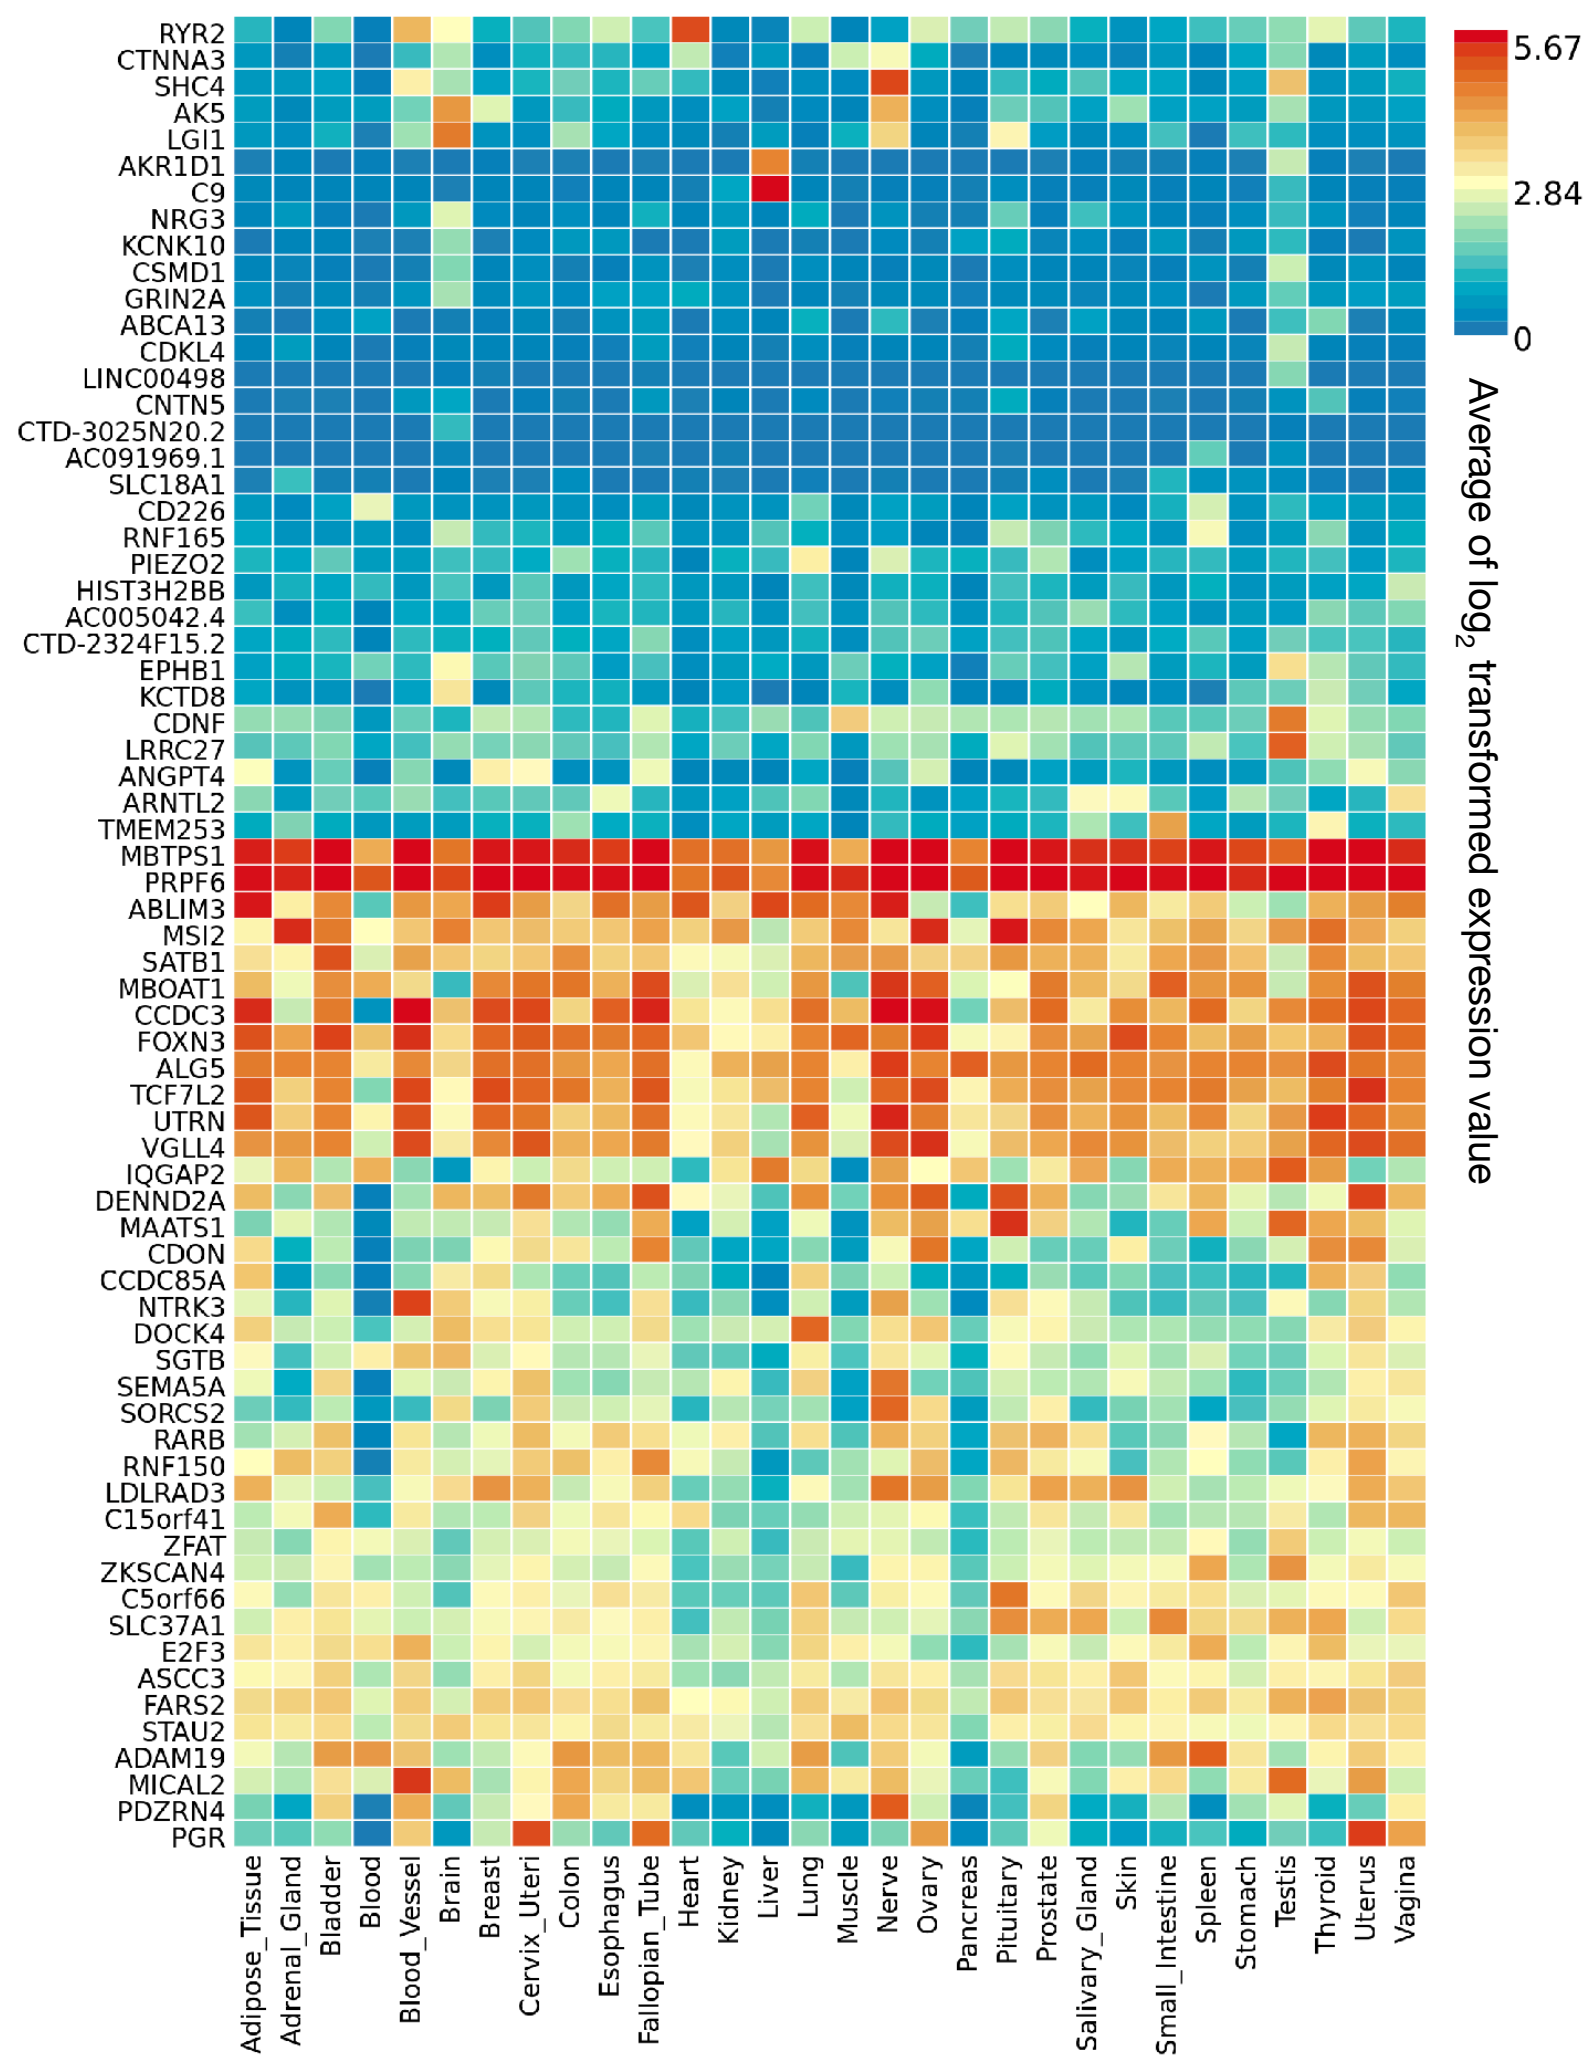

Supplement: 439_2019_2069_MOESM10_ESM.pdf [file 439_2019_2069_MOESM10_ESM.pdf]
